# Supplementary material
Source: Royal Society of Chemistry journal article supplement (doi:10.1039/d6cp00453a)
Supplement: d6cp00453a1.pdf [file d6cp00453a1.pdf]

## Supporting Information

# The two-positron gluic bond as a manifestation of ‘super’ van der Waals interactions

Mohammad Goli,<sup>[a]</sup> Dario Bressanini,<sup>[b]</sup> and Shant Shahbazian<sup>[c]</sup>

<sup>[a]</sup>Institute of Physics, Faculty of Physics, Astronomy, and Informatics, Nicolaus Copernicus  
University in Toruń, ul. Grudziądzka 5, 87-100 Toruń, Poland,  
E-mail: mgoli@umk.pl

<sup>[b]</sup>Dipartimento di Scienza e Alta Tecnologia, Università dell’Insubria, Como, Italy  
E-mail: dario.bressanini@uninsubria.it

<sup>[c]</sup>Alikhanian National Laboratory (Yerevan Physics Institute), Alikhanian  
Brothers Street 2, Yerevan 0036, Armenia  
E-mail: [shant.shahbazyan@aanl.am](mailto:shant.shahbazyan@aanl.am)

## Table of Contents

**Page 2: Table S1** Total energies of  $[H^-, e^+, H^-]$  as a function of the inter-proton distance computed at the DMC and MC-HF/[QZ:QZ] levels of theory for the singlet electronic spin states. The statistical errors of the QMC-derived energies are always below  $10^{-4}$  Hartree. All values are given in atomic units.

**Page 3: Table S2** Total energies of  $(PsH)_2$  as a function of the inter-proton distance computed at the DMC and MC-HF/[QZ:QZ] levels of theory for the singlet electronic and positronic spin states. The statistical errors of the QMC-derived energies are always below  $10^{-4}$  Hartree. All values are given in atomic units.

**Page 4: Table S3** Total energies of  $(PsH)_2$  computed using VMC method, and employing Heitler and London's wavefunction, denoted as VMC/HL (see the main text for details), as a function of the inter-proton distance, for the singlet electronic and positronic spin states. The statistical errors of the VMC-derived energies are always equal to or below  $10^{-4}$  Hartree. All values are given in atomic units.

**Page 5: Table S4** The interatomic correlation energies (see the main text for definition) computed for the ground state  $(PsH)_2$  as a function of the inter-proton distance. All values are given in atomic units.

**Page 6: Table S5** The three contributions to the interatomic correlation energy computed at the MC-MP2 level (see the main text for details), for the ground state of  $(PsH)_2$  as a function of the inter-proton distance. All values are given in atomic units.

**Table S1** Total energies of  $[H^-, e^+, H^-]$  as a function of the inter-proton distance computed at the DMC and MC-HF/[QZ:QZ] levels of theory for the singlet electronic spin states. The statistical errors of the QMC-derived energies are always below  $10^{-4}$  Hartree. All values are given in atomic units.\*

| $R_{\text{HH}}$ | DMC     | MC-HF   | $R_{\text{HH}}$ | DMC     | MC-HF   |
|-----------------|---------|---------|-----------------|---------|---------|
| 3.2             | -1.3107 | -1.1127 | 8.4             | -1.3351 | -1.1736 |
| 3.6             | -1.3165 | -1.1248 | 8.6             | -1.3344 | -1.1726 |
| 4.0             | -1.3229 | -1.1370 | 8.8             | -1.3333 | -1.1715 |
| 4.4             | -1.3290 | -1.1478 | 9.0             | -1.3324 | -1.1704 |
| 4.8             | -1.3337 | -1.1567 | 9.2             | -1.3317 | -1.1693 |
| 5.2             | -1.3370 | -1.1637 | 9.4             | -1.3310 | -1.1682 |
| 5.6             | -1.3392 | -1.1690 | 9.6             | -1.3301 | -1.1670 |
| 5.9             | -1.3399 | -1.1720 | 9.8             | -1.3294 | -1.1659 |
| 6.0             | -1.3401 | -1.1728 | 10.0            | -1.3286 | -1.1648 |
| 6.1             | -1.3403 | -1.1735 | 10.2            | -1.3280 | -1.1638 |
| 6.2             | -1.3404 | -1.1742 | 10.4            | -1.3271 | -1.1627 |
| 6.3             | -1.3405 | -1.1747 | 10.6            | -1.3266 | -1.1618 |
| 6.4             | -1.3404 | -1.1752 | 10.8            | -1.3258 | -1.1609 |
| 6.5             | -1.3404 | -1.1756 | 11.0            | -1.3253 | -1.1601 |
| 6.6             | -1.3404 | -1.1760 | 11.2            | -1.3246 | -1.1594 |
| 6.7             | -1.3402 | -1.1763 | 11.4            | -1.3242 | -1.1587 |
| 6.8             | -1.3401 | -1.1765 | 11.6            | -1.3235 | -1.1582 |
| 6.9             | -1.3398 | -1.1767 | 11.8            | -1.3231 | -1.1578 |
| 7.2             | -1.3392 | -1.1769 | 12.0            | -1.3224 | -1.1574 |
| 7.6             | -1.3379 | -1.1764 | 12.2            | -1.3220 | -1.1570 |
| 8.0             | -1.3365 | -1.1753 | 12.4            | -1.3217 | -1.1567 |
| 8.2             | -1.3357 | -1.1745 | 12.6            | -1.3213 | -1.1564 |

\* To compute the bond dissociation energies from the total energies, the following data have been employed: For  $PsH$ , DMC and MC-HF/[QZ:QZ] total energies are -0.78920 and -0.66617 Hartree, respectively, whereas for  $H^-$ , DMC and MC-HF/[QZ:QZ] total energies are -0.52775 and -0.48781 Hartree, respectively.

**Table S2** Total energies of  $(PsH)_2$  as a function of the inter-proton distance computed at the DMC and MC-HF/[QZ:QZ] levels of theory for the singlet electronic and positronic spin states. The statistical errors of the QMC-derived energies are always below  $10^{-4}$  Hartree. All values are given in atomic units.\*

| $R_{HH}$ | DMC     | MC-HF   | $R_{HH}$ | DMC     | MC-HF   |
|----------|---------|---------|----------|---------|---------|
| 3.6      | -1.5584 | -1.2890 | 9.6      | -1.5808 | -1.3326 |
| 4.0      | -1.5695 | -1.3009 | 9.8      | -1.5804 | --      |
| 4.4      | -1.5782 | -1.3104 | 10.0     | -1.5802 | -1.3326 |
| 4.8      | -1.5837 | -1.3177 | 10.2     | -1.5799 | --      |
| 5.2      | -1.5867 | -1.3230 | 10.4     | -1.5798 | -1.3325 |
| 5.6      | -1.5884 | -1.3267 | 10.6     | -1.5796 | --      |
| 5.8      | -1.5888 | --      | 10.8     | -1.5794 | -1.3325 |
| 6.0      | -1.5888 | -1.3292 | 11.0     | -1.5793 | --      |
| 6.2      | -1.5885 | --      | 11.2     | -1.5792 | -1.3325 |
| 6.4      | -1.5883 | -1.3308 | 11.4     | -1.5791 | --      |
| 6.6      | -1.5880 | --      | 11.6     | -1.5790 | -1.3325 |
| 6.8      | -1.5875 | -1.3318 | 11.8     | -1.5789 | --      |
| 7.0      | -1.5870 | --      | 12.0     | -1.5788 | -1.3325 |
| 7.2      | -1.5865 | -1.3323 | 12.2     | -1.5788 | --      |
| 7.4      | -1.5859 | --      | 12.4     | -1.5788 | --      |
| 7.6      | -1.5854 | -1.3326 | 12.6     | -1.5787 | --      |
| 7.8      | -1.5847 | --      | 12.8     | -1.5786 | --      |
| 8.0      | -1.5841 | -1.3327 | 13.0     | -1.5786 | --      |
| 8.2      | -1.5836 | -1.3327 | 13.2     | -1.5786 | --      |
| 8.3      | --      | -1.3327 | 13.4     | -1.5786 | --      |
| 8.4      | -1.5831 | -1.3327 | 13.6     | -1.5785 | --      |
| 8.6      | -1.5826 | -1.3327 | 13.8     | -1.5785 | --      |
| 8.8      | -1.5822 | -1.3327 | 14.0     | -1.5785 | --      |
| 9.0      | -1.5817 | --      | 14.2     | -1.5785 | --      |
| 9.2      | -1.5814 | -1.3327 | 14.4     | -1.5785 | --      |
| 9.4      | -1.5810 | --      |          |         |         |

\* To compute the bond dissociation energies from the total energies, the following data have been employed for  $PsH$ : DMC and MC-HF/[QZ:QZ] total energies are -0.78920 and -0.66617 Hartree, respectively.

**Table S3** Total energies of  $(PsH)_2$  computed using the VMC method, and employing Heitler and London's wavefunction, denoted as VMC/HL (see the main text for details), as a function of the inter-proton distance, for the singlet electronic and positronic spin states. The statistical errors of the VMC-derived energies are always equal to or below  $10^{-4}$  Hartree. All values are given in atomic units.

| $R_{HH}$ | VMC     | $R_{HH}$ | VMC     |
|----------|---------|----------|---------|
| 4.0      | -1.5288 | 9.6      | -1.5732 |
| 4.4      | -1.5448 | 10.0     | -1.5731 |
| 4.8      | -1.5559 | 10.4     | -1.5730 |
| 5.2      | -1.5630 | 10.8     | -1.5730 |
| 5.6      | -1.5676 | 11.2     | -1.5730 |
| 6.0      | -1.5704 | 11.6     | -1.5729 |
| 6.4      | -1.5722 | 12.0     | -1.5729 |
| 6.8      | -1.5732 | 12.4     | -1.5729 |
| 7.2      | -1.5737 | 12.8     | -1.5728 |
| 7.6      | -1.5737 | 13.2     | -1.5728 |
| 8.0      | -1.5738 | 13.6     | -1.5728 |
| 8.4      | -1.5735 | 14.0     | -1.5727 |
| 8.8      | -1.5735 | 14.4     | -1.5727 |
| 9.2      | -1.5734 | 14.8     | -1.5727 |

\* To compute the bond dissociation energies from the total energies, the following data have been employed  $PsH$  : the VMC total energy is -0.78630 Hartree.

**Table S4** The interatomic correlation energies (see the main text for definition) computed for the ground state  $(PsH)_2$  as a function of the inter-proton distance. All values are given in atomic units.\*

| $R_{HH}$ | $\Delta E^{corr}(R)$ | $R_{HH}$ | $\Delta E^{corr}(R)$ |
|----------|----------------------|----------|----------------------|
| 6.0      | -0.0135              | 9.2      | -0.0027              |
| 6.4      | -0.0114              | 9.6      | -0.0021              |
| 6.8      | -0.0097              | 10.0     | -0.0016              |
| 7.2      | -0.0081              | 10.4     | -0.0012              |
| 7.6      | -0.0067              | 10.8     | -0.0009              |
| 8.0      | -0.0054              | 11.2     | -0.0006              |
| 8.4      | -0.0043              | 11.6     | -0.0005              |
| 8.8      | -0.0034              | 12.0     | -0.0003              |

\* The employed correlation energy of  $PsH$  is 0.12302 Hartree.

**Table S5** The three contributions to the interatomic correlation energy computed at the MC-MP2 level (see the main text for details), for the ground state of  $(PsH)_2$  as a function of the inter-proton distance. All values are given in atomic units.\*

| $R_{HH}$ | $\Delta E_{ee}^{corr}(R)$ | $\Delta E_{ep}^{corr}(R)$ | $E_{pp}^{corr}(R)$ |
|----------|---------------------------|---------------------------|--------------------|
| 5.2      | -0.0026                   | -0.0133                   | -0.0164            |
| 5.6      | -0.0020                   | -0.0110                   | -0.0147            |
| 6.0      | -0.0015                   | -0.0088                   | -0.0127            |
| 6.4      | -0.0012                   | -0.0068                   | -0.0106            |
| 6.8      | -0.0009                   | -0.0052                   | -0.0086            |
| 7.2      | -0.0007                   | -0.0039                   | -0.0068            |
| 7.6      | -0.0005                   | -0.0029                   | -0.0053            |
| 8.0      | -0.0004                   | -0.0021                   | -0.0041            |
| 8.4      | -0.0003                   | -0.0015                   | -0.0031            |
| 8.8      | -0.0002                   | -0.0011                   | -0.0024            |
| 9.2      | -0.0002                   | -0.0008                   | -0.0018            |
| 9.6      | -0.0001                   | -0.0006                   | -0.0013            |
| 10.0     | -0.0001                   | -0.0004                   | -0.0010            |
| 10.4     | -0.0001                   | -0.0003                   | -0.0007            |
| 10.8     | -0.0001                   | -0.0002                   | -0.0006            |
| 11.2     | 0.0000                    | -0.0002                   | -0.0004            |
| 11.6     | 0.0000                    | -0.0002                   | -0.0003            |
| 12.0     | 0.0000                    | -0.0001                   | -0.0003            |
| 12.4     | 0.0000                    | -0.0001                   | -0.0002            |
| 12.8     | 0.0000                    | -0.0001                   | -0.0002            |
| 13.2     | 0.0000                    | -0.0001                   | -0.0001            |
| 13.6     | 0.0000                    | -0.0001                   | -0.0001            |
| 14.0     | 0.0000                    | -0.0001                   | -0.0001            |
| 14.4     | 0.0000                    | 0.0000                    | -0.0001            |

\* The used electron-electron and electron-positron correlation energies of  $PsH$  are 0.02884 and 0.03633 Hartree, respectively.
